# Supplementary material for: Zirconium organophosphonates as photoactive and hydrophobic host materials for sensitized luminescence of Eu(iii), Tb(iii), Sm(iii) and Dy(iii)
Source: Royal Society of Chemistry journal article supplement (doi:10.1039/b410222c), 2004-01-01
Supplement: b410222c.pdf [file b410222c.pdf]

## Supplementary data

### **Zirconium organophosphonates as photoactive and hydrophobic host materials for sensitized luminescence of Eu(III), Tb(III), Sm(III), and Dy(III)**

R. Ferreira,<sup>a,b</sup> P. Pires,<sup>b</sup> B. de Castro,<sup>a</sup> R. A. Sá Ferreira,<sup>c</sup> L. D. Carlos<sup>c</sup> and U. Pischel<sup>1a\*</sup>

<sup>a</sup> *CEQUP/ Departamento de Química, Faculdade de Ciências, Universidade do Porto,  
R. Campo Alegre, 4169-007 Porto, Portugal*

<sup>b</sup> *ESTG/ Instituto Politécnico de Viana do Castelo, Av. do Atlântico, 4900-908 Viana  
do Castelo, Portugal*

<sup>c</sup> *Departamento de Física, CICECO, Universidade de Aveiro, 3810-193 Aveiro,  
Portugal*

**Synthesis of phenylphosphonic acid.** Phenylphosphonic acid was prepared by oxidation of phenylphosphinic acid. 10.0 g (69.7 mmol) of phenylphosphinic acid were melted in a round-bottom flask equipped with a thermometer. When the temperature reached 100 °C, 3.5 mL (54.4 mmol) concentrated nitric acid was added carefully. After cooling down to room temperature, the yellow solid was poured into 100 mL water and the product extracted with 3 × 50 mL diethylether. The combined organic phase was dried over MgSO<sub>4</sub>. After removal of the solvent and re-crystallization from diethylether a colorless solid was obtained (4.2 g, 40 % yield). M.p., 160-161 °C (lit., m.p., 158 °C).

$C_6H_7O_3P$ : calcd. C 45.54 %, H 4.43 %; found C 45.52 %, H 4.46 %.  $^1H$  NMR (200 MHz,  $d_6$ -DMSO):  $\delta$  7.99 (br, 2H), 7.79-7.64 (m, 2H), 7.54-7.38 (m, 3H).

**Synthesis of *m*-sulfophenylphosphonic acid.** 17.0 g (105.0 mmol) Phenylphosphonic acid was added under stirring and at room temperature to 22 mL (321.0 mmol) chlorosulfonic acid. Then the solution was heated to 150 °C for three hours. After cooling down to room temperature the excess of chlorosulfonic acid was removed with a rotary evaporator, yielding viscous oil. This oil was dissolved in 120 mL diethylether, and under ice-cooling 40 mL of water was added. After extraction with 3 × 50 mL diethylether, the combined organic phase was dried over  $MgSO_4$ . Upon removal of the solvent, *m*-sulfophenylphosphonic acid was obtained as crystalline solid (15.9 g, 59 % yield). The solid is very hygroscopic, such that no exact elemental analysis could be obtained.  $^1H$  NMR (200 MHz,  $D_2O$ ):  $\delta$  8.28-8.21 (d, 1H), 8.08-7.93 (m, 2H), 7.74-7.65 (m, 1H), 5.44 (s, 2H).

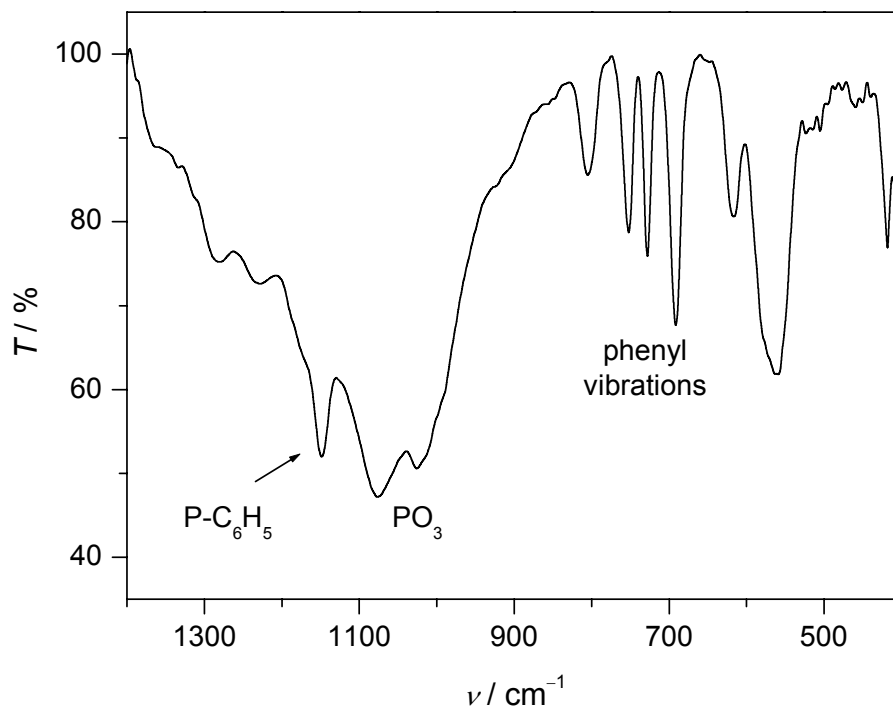

FT-IR spectrum of parent ZrSPP.

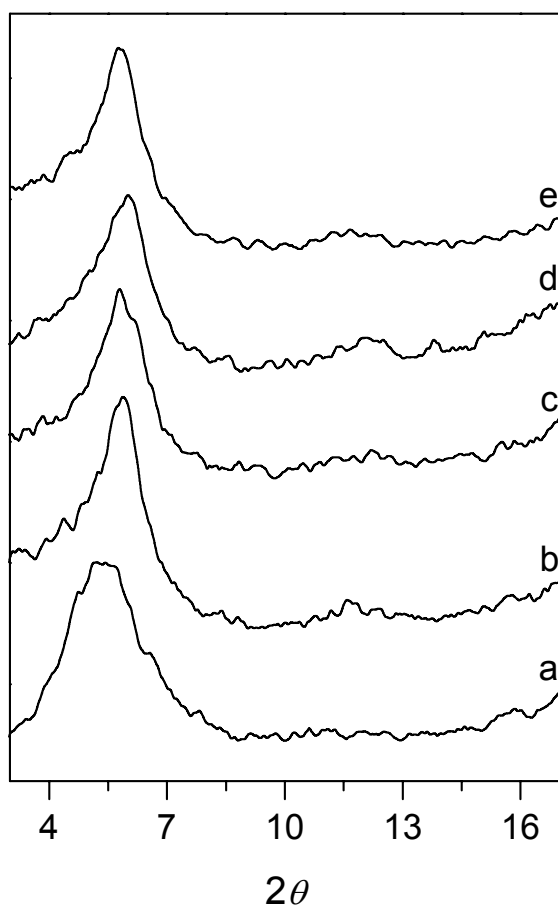

Powder X-ray diffraction patterns of (a) Na@ZrSPP, (b) Eu@ZrSPP,  
(c) Tb@ZrSPP, (d) Sm@ZrSPP, and (e) Dy@ZrSPP.
